# Supplementary material for: The Origin of Synchysite-(Ce) and Sources of Rare Earth Elements in the Rožná Uranium Deposit, Czech Republic
Source: MDPI journal article supplement (doi:10.3390/min12060690), 2022-05-29
Supplement: s1 [file s1]

**Table S1.** Electron-microprobe data (in wt.%) for coffinitized uraninite (cofu) and coffinite from the synchysite-bearing vein in the Rožná uranium deposit.

| Analysis No. | Mineral   | SiO <sub>2</sub> | Al <sub>2</sub> O <sub>3</sub> | TiO <sub>2</sub> | ZrO <sub>2</sub> | UO <sub>2</sub> | PbO    | CaO   | FeO  | MnO    | P <sub>2</sub> O <sub>5</sub> | F      |
|--------------|-----------|------------------|--------------------------------|------------------|------------------|-----------------|--------|-------|------|--------|-------------------------------|--------|
| 59464        | cofu      | 8.11             | 1.17                           | 0.28             | 2.55             | 76.1            | 2.32   | 3.86  | 1.07 | 0.66   | b.d.l.                        | b.d.l. |
| 59464        | cofu      | 11.2             | 1.54                           | 0.39             | 2.70             | 75.6            | 0.56   | 3.79  | 0.89 | 0.42   | b.d.l.                        | b.d.l. |
| 59464        | cofu      | 11.8             | 1.94                           | 0.50             | 2.10             | 75.1            | 0.47   | 3.56  | 0.77 | 0.49   | b.d.l.                        | b.d.l. |
| 59464        | cofu      | 13.1             | 2.11                           | 0.288            | 2.80             | 53.9            | 0.21   | 16.4  | 0.57 | 0.22   | b.d.l.                        | b.d.l. |
| 59464        | cofu      | 7.9              | 1.29                           | 0.11             | 0.95             | 79.6            | 1.97   | 3.82  | 0.92 | 0.62   | b.d.l.                        | b.d.l. |
| 59464        | cofu      | 12.2             | 1.88                           | 0.17             | 1.34             | 76.4            | 0.31   | 3.39  | 0.84 | 0.44   | b.d.l.                        | b.d.l. |
| 59464        | cofu      | 12.5             | 2.16                           | 0.29             | 2.26             | 74.9            | 0.477  | 3.35  | 0.69 | 0.34   | b.d.l.                        | b.d.l. |
| 59464        | cofu      | 8.48             | 1.38                           | 0.43             | 2.59             | 78.2            | 1.31   | 3.73  | 1.02 | 0.66   | b.d.l.                        | b.d.l. |
| 59496        | cofu      | 7.85             | 0.68                           | 0.10             | 0.19             | 80.5            | 2.02   | 2.21  | 0.59 | 0.36   | 0.65                          | 0.10   |
| 59496        | cofu      | 8.09             | 1.11                           | 0.29             | 1.041            | 79.1            | 1.83   | 2.94  | 0.78 | 0.56   | 0.14                          | b.d.l. |
| 59496        | coffinite | 8.34             | 1.13                           | 0.29             | 0.88             | 80.1            | 1.67   | 2.70  | 0.82 | 0.61   | 0.18                          | b.d.l. |
| 59496        | coffinite | 17.5             | 3.028                          | 1.00             | 1.93             | 67.1            | 2.01   | 2.45  | 1.08 | 0.156  | 0.45                          | b.d.l. |
| 59496        | cofu      | 21.7             | 3.93                           | 0.26             | 1.57             | 63.4            | b.d.l. | 1.306 | 1.16 | b.d.l. | 0.67                          | b.d.l. |
| 59496        | cofu      | 9.55             | 1.11                           | 0.153            | 0.82             | 77.2            | b.d.l. | 2.34  | 0.63 | 0.51   | 0.10                          | b.d.l. |
| 59465        | coffinite | 20.8             | 3.08                           | 19.2             | 4.02             | 36.5            | 0.43   | 2.81  | 1.19 | 0.16   | b.d.l.                        | b.d.l. |
| 59465        | coffinite | 22.7             | 3.44                           | 17.2             | 3.97             | 34.9            | 0.18   | 2.72  | 3.24 | 0.34   | b.d.l.                        | b.d.l. |
| 59455        | cofu      | 13.7             | 1.25                           | 0.87             | 2.74             | 64.1            | b.d.l. | 1.56  | 0.39 | b.d.l. | 0.27                          | 0.29   |
| 59455        | cofu      | 15.7             | 1.45                           | 0.76             | 4.18             | 59.6            | b.d.l. | 1.56  | 1.36 | b.d.l. | 0.37                          | 0.24   |

| Analysis No. | Mineral | Ce <sub>2</sub> O <sub>3</sub> | Nd <sub>2</sub> O <sub>3</sub> | Sm <sub>2</sub> O <sub>3</sub> | Gd <sub>2</sub> O <sub>3</sub> | Dy <sub>2</sub> O <sub>3</sub> | Y <sub>2</sub> O <sub>3</sub> | Er <sub>2</sub> O <sub>3</sub> | Yb <sub>2</sub> O <sub>3</sub> | Sum  |
|--------------|---------|--------------------------------|--------------------------------|--------------------------------|--------------------------------|--------------------------------|-------------------------------|--------------------------------|--------------------------------|------|
| 59464        | cofu    | 0.47                           | b.d.l.                         | b.d.l.                         | b.d.l.                         | 0.49                           | b.d.l.                        | b.d.l.                         | b.d.l.                         | 97.0 |
| 59464        | cofu    | 0.77                           | 0.13                           | 0.20                           | b.d.l.                         | 0.15                           | b.d.l.                        | b.d.l.                         | b.d.l.                         | 98.3 |
| 59464        | cofu    | 0.58                           | b.d.l.                         | b.d.l.                         | b.d.l.                         | b.d.l.                         | b.d.l.                        | b.d.l.                         | b.d.l.                         | 97.3 |
| 59464        | cofu    | 0.86                           | b.d.l.                         | 0.24                           | b.d.l.                         | b.d.l.                         | b.d.l.                        | b.d.l.                         | b.d.l.                         | 90.6 |
| 59464        | cofu    | 0.48                           | 0.28                           | 0.12                           | 0.16                           | b.d.l.                         | b.d.l.                        | b.d.l.                         | b.d.l.                         | 98.3 |
| 59464        | cofu    | 0.99                           | 0.31                           | 0.21                           | 0.44                           | 0.14                           | b.d.l.                        | b.d.l.                         | b.d.l.                         | 99.0 |
| 59464        | cofu    | 0.29                           | 0.16                           | b.d.l.                         | b.d.l.                         | b.d.l.                         | b.d.l.                        | b.d.l.                         | b.d.l.                         | 97.4 |
| 59464        | cofu    | 0.32                           | b.d.l.                         | b.d.l.                         | b.d.l.                         | 0.29                           | b.d.l.                        | b.d.l.                         | b.d.l.                         | 98.4 |
| 59496        | cofu    | b.d.l.                         | b.d.l.                         | 0.18                           | b.d.l.                         | b.d.l.                         | b.d.l.                        | b.d.l.                         | b.d.l.                         | 95.5 |
| 59496        | cofu    | 0.15                           | b.d.l.                         | 0.19                           | b.d.l.                         | 0.29                           | b.d.l.                        | 0.26                           | b.d.l.                         | 96.8 |

|       |           |       |        |        |        |        |        |        |        |        |
|-------|-----------|-------|--------|--------|--------|--------|--------|--------|--------|--------|
| 59496 | coffinite | 0.42  | b.d.l. | b.d.l. | b.d.l. | b.d.l. | 0.29   | b.d.l. | 0.29   | 97.4   |
| 59496 | coffinite | 0.21  | 0.15   | b.d.l. | b.d.l. | 0.14   | b.d.l. | b.d.l. | b.d.l. | 97.2   |
| 59496 | cofu      | 0.57  | b.d.l. | 94.5   |
| 59496 | cofu      | 0.38  | b.d.l. | 92.9   |
| 59465 | coffinite | 1.41  | b.d.l. | 89.7   |
| 59465 | coffinite | 1.43  | b.d.l. | b.d.l. | 0.19   | b.d.l. | b.d.l. | 0.12   | b.d.l. | 90.7   |
| 59455 | cofu      | 0.614 | 0.25   | b.d.l. | b.d.l. | b.d.l. | b.d.l. | 0.11   | b.d.l. | 86.244 |
| 59455 | cofu      | 0.71  | 0.16   | b.d.l. | b.d.l. | b.d.l. | 0.12   | b.d.l. | 0.12   | 86.50  |

b.d.l.: Below detection limit.

**Table S2.** Chemical composition of titanite in host rocks of the synchisite-bearing vein in the Rožná uranium deposit. Concentrations of oxides and F in wt.%, EMPU.

| Sample No.                     | HT1    | HT2    | HT3    | HT4    | HT5    | HT6    | HT7    |
|--------------------------------|--------|--------|--------|--------|--------|--------|--------|
| Oxides                         |        |        |        |        |        |        |        |
| SiO <sub>2</sub>               | 30.442 | 30.412 | 30.151 | 30.285 | 30.305 | 29.988 | 30.496 |
| Al <sub>2</sub> O <sub>3</sub> | 1.66   | 1.919  | 1.444  | 1.469  | 1.54   | 2.539  | 1.737  |
| TiO <sub>2</sub>               | 37.058 | 36.511 | 36.586 | 37.159 | 37.005 | 35.057 | 36.697 |
| CaO                            | 28.132 | 28.14  | 27.699 | 28.069 | 28.074 | 26.176 | 28.515 |
| FeO                            | 0.147  | 0.203  | 0.214  | 0.191  | 0.209  | 0.098  | 0.113  |
| MnO                            | 0.141  | 0.15   | 0.139  | 0.144  | 0.142  | 0.18   | 0.108  |
| F                              | 0.414  | 0.466  | 0.353  | 0.368  | 0.396  | 0.432  | 0.493  |
| Nd <sub>2</sub> O <sub>3</sub> | b.d.l. | b.d.l. | 0.175  | 0.123  | 0.12   | b.d.l. | b.d.l. |
| Ce <sub>2</sub> O <sub>3</sub> | 0.176  | 0.179  | 0.357  | 0.324  | 0.232  | 0.152  | 0.165  |
| Y <sub>2</sub> O <sub>3</sub>  | 0.112  | 0.121  | 0.258  | 0.182  | 0.177  | 2.639  | 0.136  |
| Nb <sub>2</sub> O <sub>5</sub> | 0.093  | b.d.l. | 0.049  | b.d.l. | b.d.l. | b.d.l. | b.d.l. |
| Gd <sub>2</sub> O <sub>3</sub> | b.d.l. | b.d.l. | b.d.l. | b.d.l. | 0.129  | 0.282  | b.d.l. |
| Dy <sub>2</sub> O <sub>3</sub> | b.d.l. | b.d.l. | b.d.l. | b.d.l. | b.d.l. | 0.461  | b.d.l. |
| V <sub>2</sub> O <sub>3</sub>  | 0.277  | 0.31   | 0.26   | 0.289  | 0.075  | 0.148  | 0.194  |
| Sum                            | 98.652 | 98.411 | 97.685 | 98.603 | 98.404 | 98.152 | 98.654 |
| apfu (based on 5O)             |        |        |        |        |        |        |        |
| Si                             | 1.011  | 1.013  | 1.014  | 1.009  | 1.012  | 1.013  | 1.014  |
| Al                             | 0.065  | 0.075  | 0.057  | 0.058  | 0.061  | 0.101  | 0.068  |
| Ti                             | 0.926  | 0.914  | 0.926  | 0.931  | 0.929  | 0.891  | 0.917  |
| Ca                             | 1.001  | 1.004  | 0.999  | 1.002  | 1.004  | 0.948  | 1.016  |

|    |        |        |        |        |        |        |        |
|----|--------|--------|--------|--------|--------|--------|--------|
| Fe | 0.004  | 0.006  | 0.006  | 0.005  | 0.006  | 0.003  | 0.003  |
| Mn | 0.004  | 0.004  | 0.004  | 0.004  | 0.004  | 0.005  | 0.003  |
| Nd | b.d.l. | b.d.l. | 0.002  | 0.001  | 0.001  | b.d.l. | b.d.l. |
| Ce | 0.002  | 0.002  | 0.004  | 0.004  | 0.003  | 0.002  | 0.002  |
| Y  | 0.002  | 0.002  | 0.004  | 0.003  | 0.003  | 0.042  | 0.002  |
| Nb | 0.001  | b.d.l. | 0.001  | b.d.l. | b.d.l. | b.d.l. | b.d.l. |
| Gd | b.d.l. | b.d.l. | b.d.l. | b.d.l. | 0.001  | 0.003  | b.d.l. |
| Dy | b.d.l. | b.d.l. | b.d.l. | b.d.l. | b.d.l. | 0.005  | b.d.l. |
| V  | 0.007  | 0.008  | 0.007  | 0.008  | 0.002  | 0.004  | 0.005  |
| F  | 0.022  | 0.025  | 0.019  | 0.019  | 0.021  | 0.023  | 0.026  |
| O  | 4.978  | 4.975  | 4.981  | 4.981  | 4.979  | 4.977  | 4.974  |

Below detection limit: ZrO<sub>2</sub>, ThO<sub>2</sub>, UO<sub>2</sub>, La<sub>2</sub>O<sub>3</sub>, Sm<sub>2</sub>O<sub>3</sub>.

**Table S3.** Chemical composition of hydrothermal xenotime and monazite (products of titanite alteration). In wt.%, EMPA.

| <b>Analysis</b>                | <b>64558/ 3</b> | <b>64558/ 4</b> | <b>64558/ 4</b> | <b>64558/4</b> | <b>64558/3</b> |
|--------------------------------|-----------------|-----------------|-----------------|----------------|----------------|
| Mineral                        | Xenotime        | Xenotime        | Monazite        | Monazite       | Monazite       |
| MgO                            | 1.76            | b.d.l.          | b.d.l.          | 2.71           | b.d.l.         |
| Al <sub>2</sub> O <sub>3</sub> | b.d.l.          | b.d.l.          | 0.9             | 2.12           | 5.31           |
| SiO <sub>2</sub>               | 3.23            | b.d.l.          | 22.33           | 2.82           | 7.16           |
| P <sub>2</sub> O <sub>5</sub>  | 30.1            | 35.07           | 25.17           | 27.43          | 24.2           |
| K <sub>2</sub> O               | b.d.l.          | b.d.l.          | b.d.l.          | 0.36           | 0.59           |
| CaO                            | 5.59            | 0.66            | 1.84            | 5.49           | 2.14           |
| TiO <sub>2</sub>               | 1.03            | 2.36            | b.d.l.          | b.d.l.         | 5.52           |
| Y <sub>2</sub> O <sub>3</sub>  | 41.99           | 46.9            | b.d.l.          | b.d.l.         | b.d.l.         |
| La <sub>2</sub> O <sub>3</sub> | b.d.l.          | b.d.l.          | 11              | 6.08           | 9.7            |
| Ce <sub>2</sub> O <sub>3</sub> | b.d.l.          | b.d.l.          | 25.62           | 24.3           | 24.38          |
| Pr <sub>2</sub> O <sub>3</sub> | b.d.l.          | b.d.l.          | b.d.l.          | 4.13           | 2.71           |
| Nd <sub>2</sub> O <sub>3</sub> | b.d.l.          | b.d.l.          | 13.15           | 17.1           | 13.47          |
| Sm <sub>2</sub> O <sub>3</sub> | b.d.l.          | b.d.l.          | b.d.l.          | 3.7            | 2.76           |
| Gd <sub>2</sub> O <sub>3</sub> | 2.44            | 3.1             | b.d.l.          | 1.95           | 1.41           |
| Dy <sub>2</sub> O <sub>3</sub> | 4.84            | 4.39            | b.d.l.          | b.d.l.         | b.d.l.         |
| Er <sub>2</sub> O <sub>3</sub> | 3.1             | 3.99            | b.d.l.          | b.d.l.         | b.d.l.         |
| Yb <sub>2</sub> O <sub>3</sub> | 3.72            | 2.4             | b.d.l.          | b.d.l.         | b.d.l.         |
| U <sub>2</sub> O <sub>4</sub>  | 2.2             | 1.13            | b.d.l.          | b.d.l.         | b.d.l.         |

|      |     |     |        |       |       |
|------|-----|-----|--------|-------|-------|
| Suma | 100 | 100 | 100.01 | 99.42 | 99.35 |
|------|-----|-----|--------|-------|-------|

b.d.l.: below detection limit.

**Table S4.** Isotope composition of oxygen and carbon in calcites I (older generation) and calcite II (younger generation) from the synchysite-bearing, post-uranium, quartz-carbonate-sulfide vein in Rožná and recalculated isotopic composition of oxygen and carbon of fluid.

| Sample  | Mineral    | $\delta^{13}\text{C}$ | $\delta^{18}\text{O}$ | $\delta^{13}\text{C}_{\text{fluid}}$ | $\delta^{18}\text{O}_{\text{fluid}}$ |
|---------|------------|-----------------------|-----------------------|--------------------------------------|--------------------------------------|
|         |            | (‰ V-PDB)             | (‰ V-SMOW)            | (‰ V-PDB)                            | (‰ V-SMOW)                           |
| 25-1    | Calcite I  | -5.2                  | 15.6                  | -6.2                                 | -4.5                                 |
| 25-2    | Calcite I  | -5.13                 | 14.76                 | -6.13                                | -5.34                                |
| 158-4-1 | Calcite I  | -4.74                 | 15.26                 | -5.74                                | -4.84                                |
| 158-4-2 | Calcite I  | -4.75                 | 15.25                 | -5.75                                | -4.85                                |
| 158-5   | Calcite I  | -4.72                 | 15.83                 | -5.72                                | -4.27                                |
| 158-7B  | Calcite I  | -5.04                 | 17.36                 | -6.04                                | -2.74                                |
| 158-6   | Calcite I  | -5.02                 | 17.56                 | -6.02                                | -2.54                                |
| 26-1    | Calcite II | -4.65                 | 18.22                 | -5.65                                | -1.88                                |
| 158-8   | Calcite II | -4.89                 | 17.96                 | -5.89                                | -2.14                                |
| 158-9   | Calcite II | -5.16                 | 17.3                  | -6.16                                | -2.8                                 |
